# Supplementary material for: The slip tendency of 3D faults in Germany
Source: Copernicus journal article supplement (doi:10.5194/sand-2-73-2023), 2023-09-06
Supplement: Supplementary file 1 [file sand-2-73-2023-supplement.pdf]

Supplement of Saf. Nucl. Waste Disposal, 2, 73–73, 2023  
<https://doi.org/10.5194/sand-2-73-2023-supplement>  
© Author(s) 2023. CC BY 4.0 License.

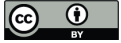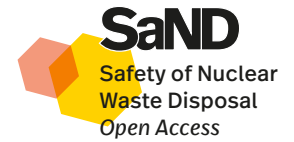

*Supplement of*

## **The slip tendency of 3D faults in Germany**

**Luisa Röckel**

*Correspondence to:* Luisa Röckel (luisa.roeckel@kit.edu)

The copyright of individual parts of the supplement might differ from the article licence.

# The slip tendency of 3D faults in Germany

Luisa Röckel, Steffen Ahlers, Tobias Hergert, Birgit Müller, Karsten Reiter, Moritz Ziegler, Victoria Kuznetsova, Oliver Heidbach, Andreas Henk, Frank Schilling

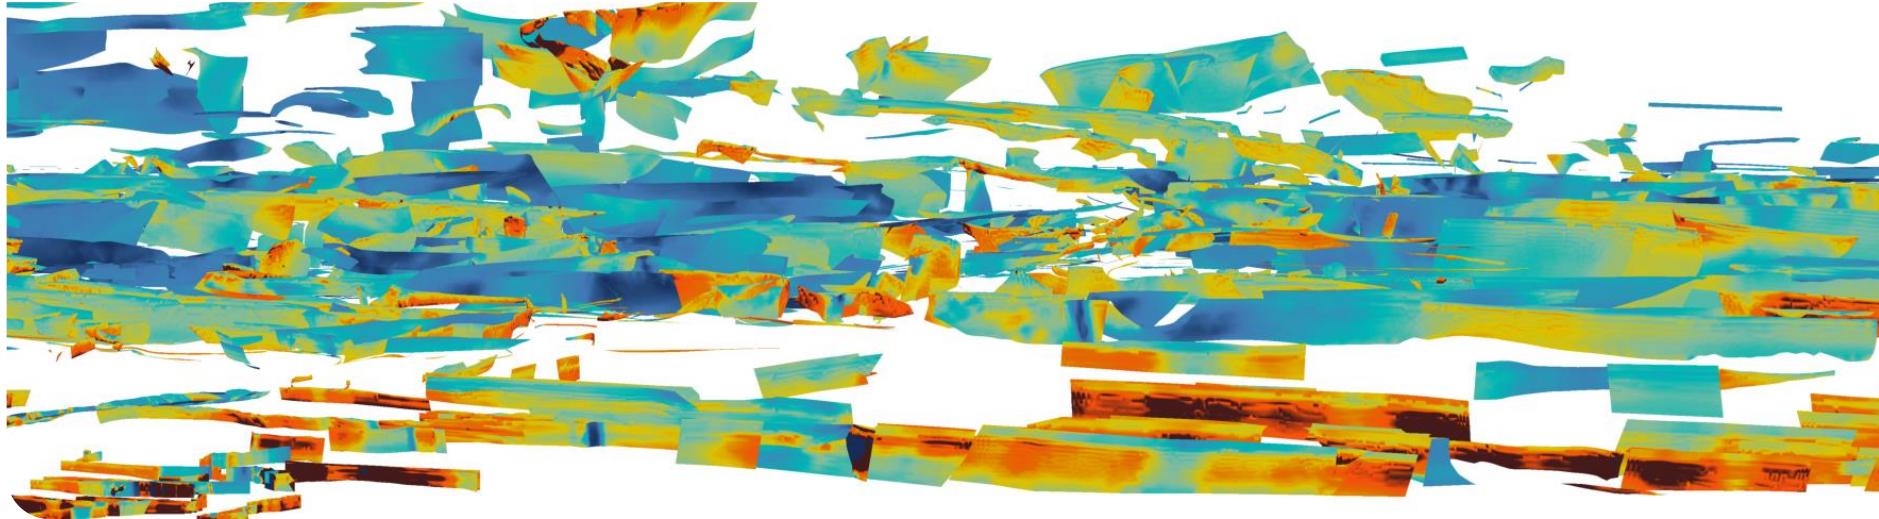

# Faults & their reactivation

- A fault is a discontinuity in the rocks of the underground that separates discrete units.
- Stresses acting in the underground can lead to movement along these faults.
- This fault reactivation can lead e.g. to earthquakes or the change of fluid pathways.

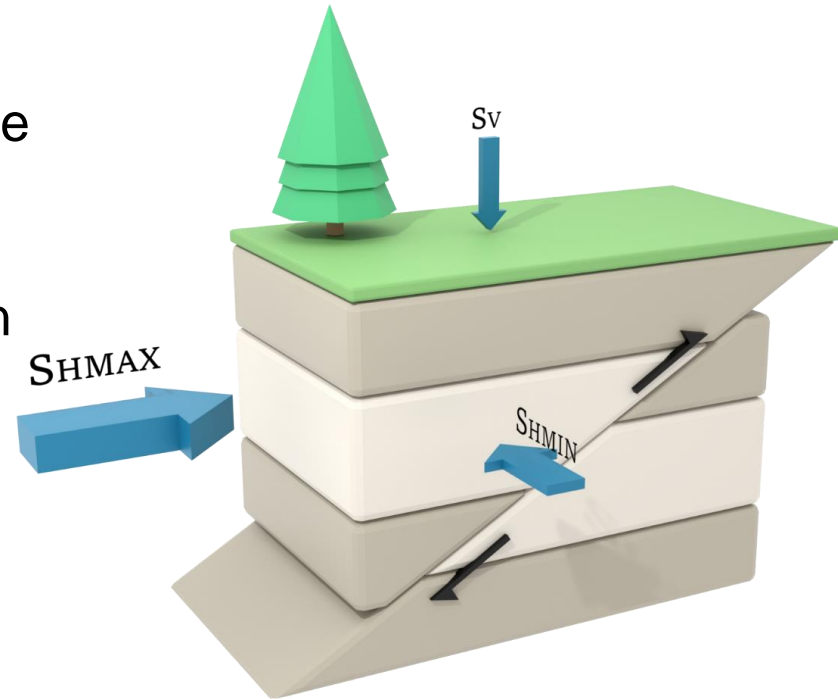

# Faults & their reactivation

- The reactivation potential of a fault depends on many factors:

- The fault geometry

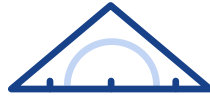

- The initial stresses (orientations and magnitudes) acting on the faults

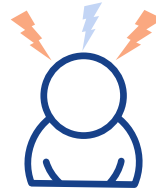

- The frictional properties of the fault

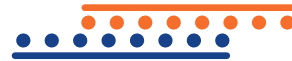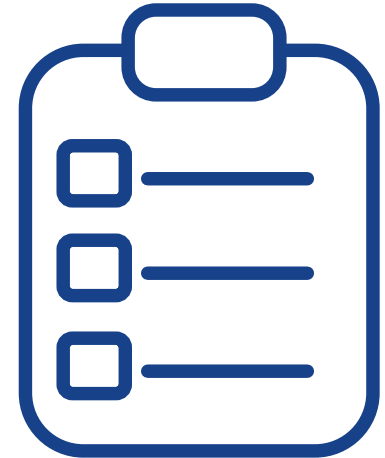

# Fault Geometries

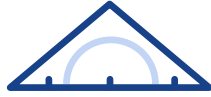

- Models of the federal states and of some projects provide 3D fault geometries.

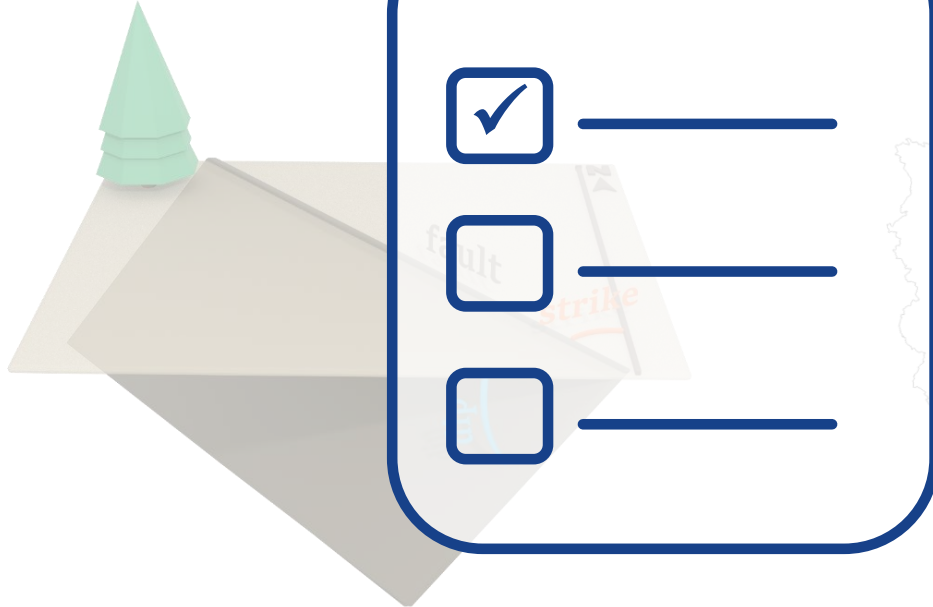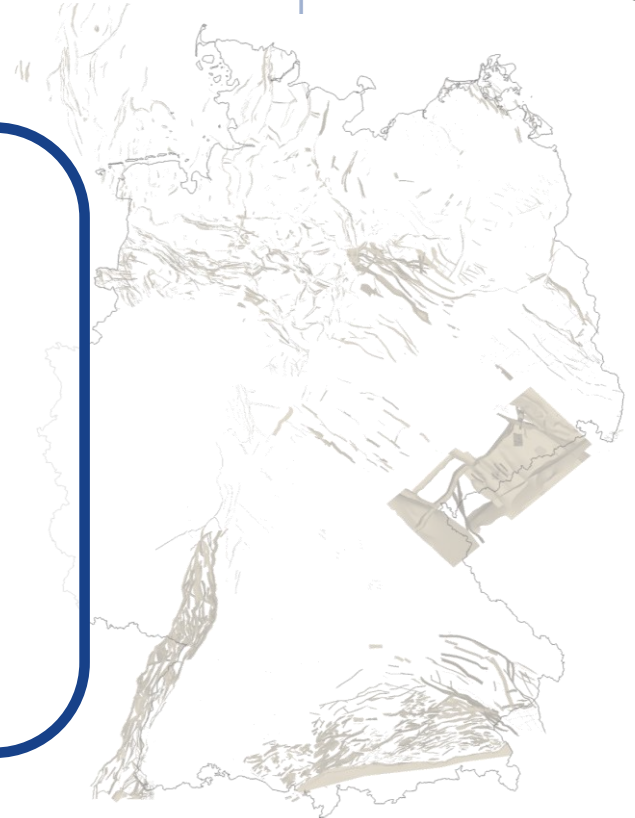

# The initial stress

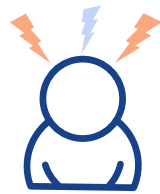

- Stress data are only available pointwise and not for all regions of Germany.
- Only parts of the relevant stress information are available (e.g. only orientations or one magnitude).
- These data do not suffice for the assessment of the fault reactivation potential throughout Germany.

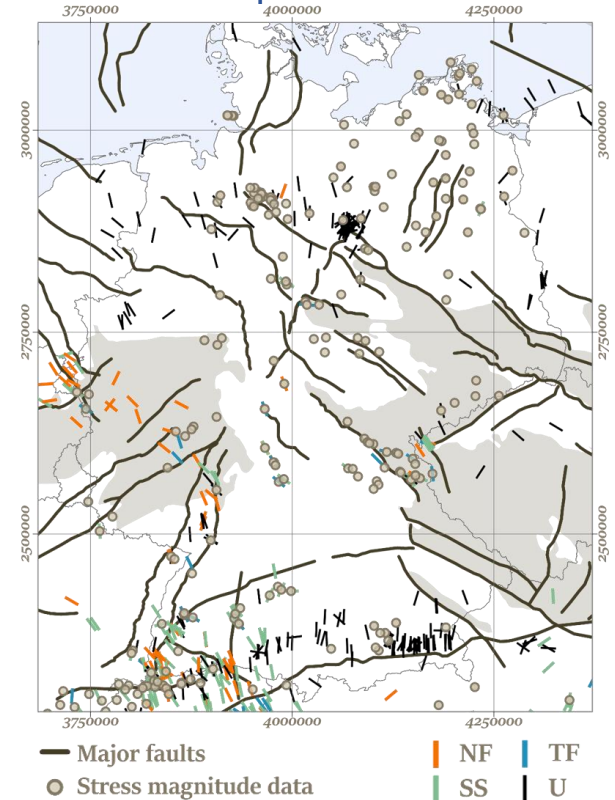

# The initial stress

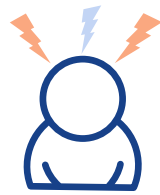

- The geomechanical-numerical model of Germany by Ahlers et al. (2022) provides the required stress magnitudes and orientations

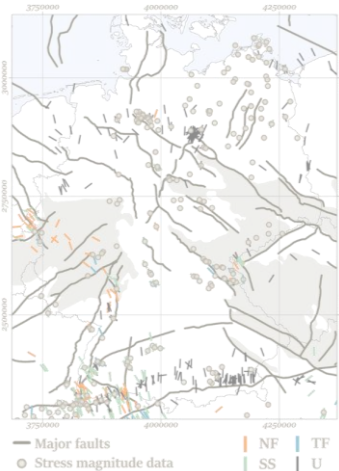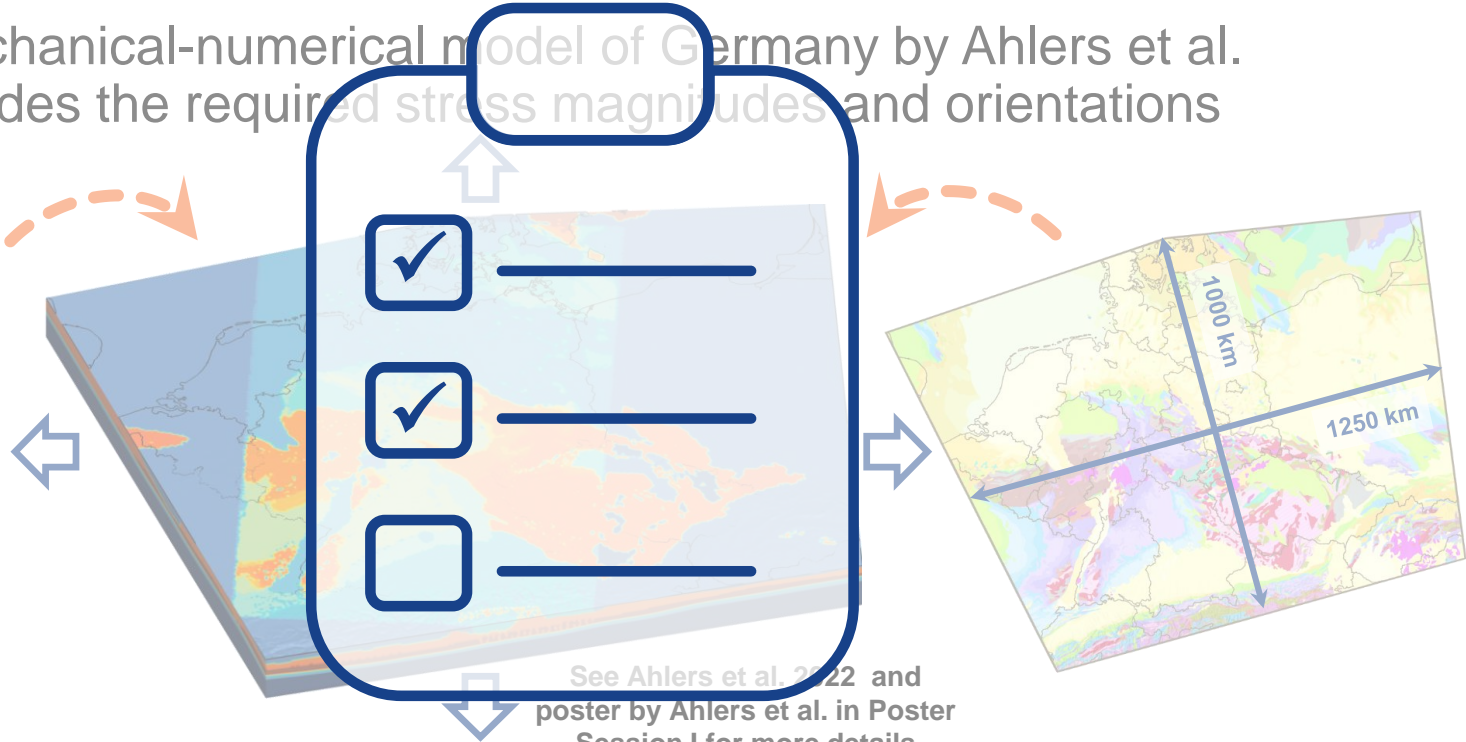

# A measure for fault reactivation: The Slip Tendency

- The slip tendency can be calculated as the ratio between the shear stress  $\tau$  and the normal stress  $\sigma_n$ :

$$T_s = \frac{\tau}{\sigma_n}$$

- Reactivation is likely when the  $T_s$  exceeds the frictional strength of the fault.

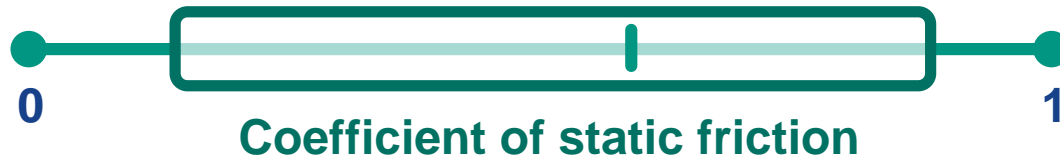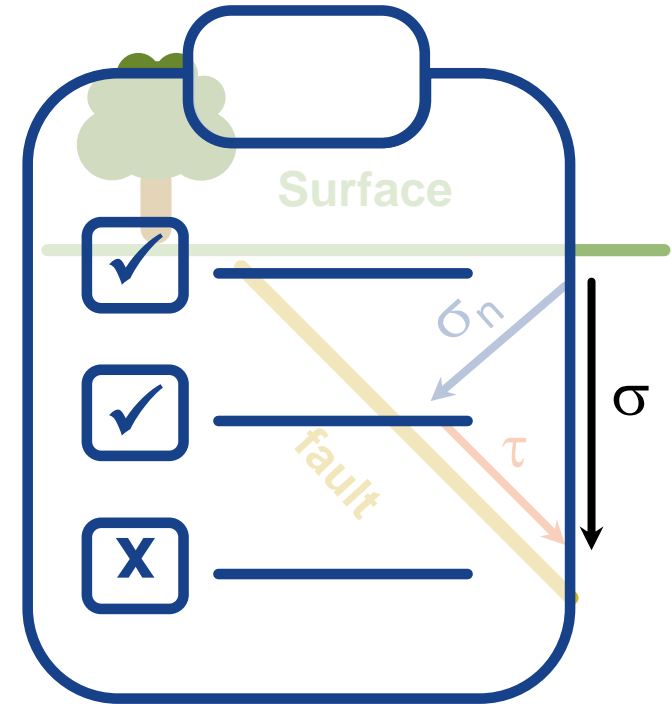



# Slip Tendency Results

- Slip tendency of 12.000 faults and fault segments were calculated.
- Slip tendency mostly ranges between 0 and 1.
- Big differences between different regions:

**Upper Rhine Graben (URG)**

**North German Basin (NGB)**

**Saxony & Ore Mountains**

**Molasse Basin**

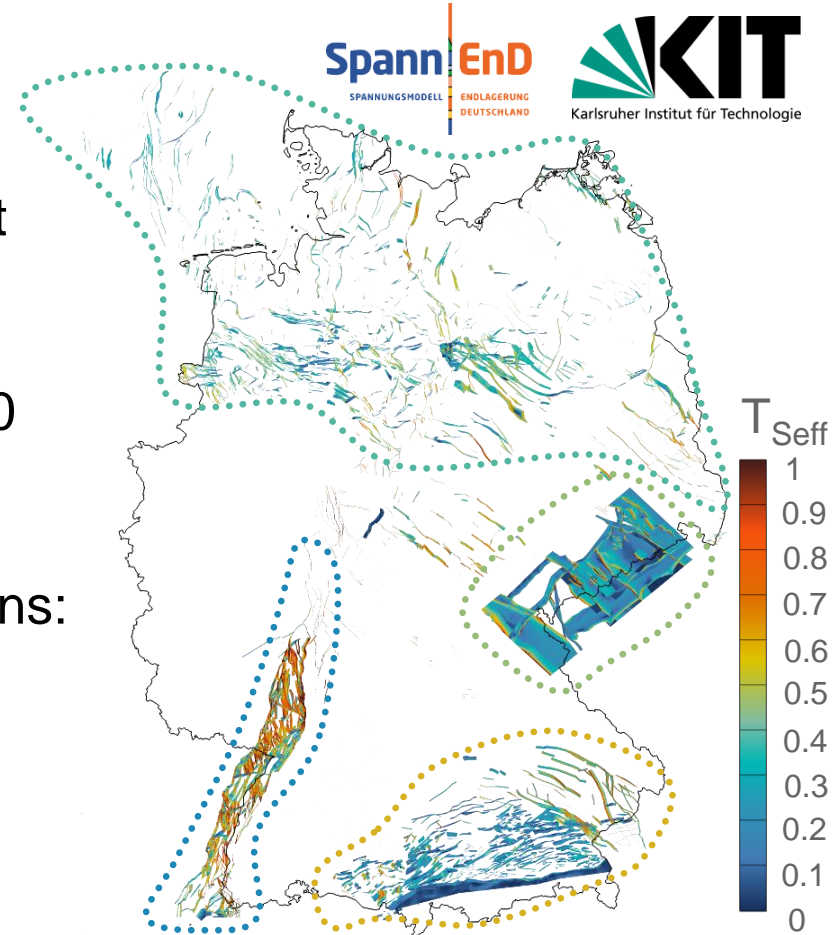

# Results: Upper Rhine Graben

- Faults strike mostly N – S to NNE – SSW and NNW – SSE.
- Faults dip quite steeply ( $60^\circ$  –  $90^\circ$ ).
- Slip tendency regularly exceeds values of 0.7.
- Median slip tendency is the highest for faults striking in N – S and in NW – SE to NNW – SSE direction (Median  $> 0.6$ ).

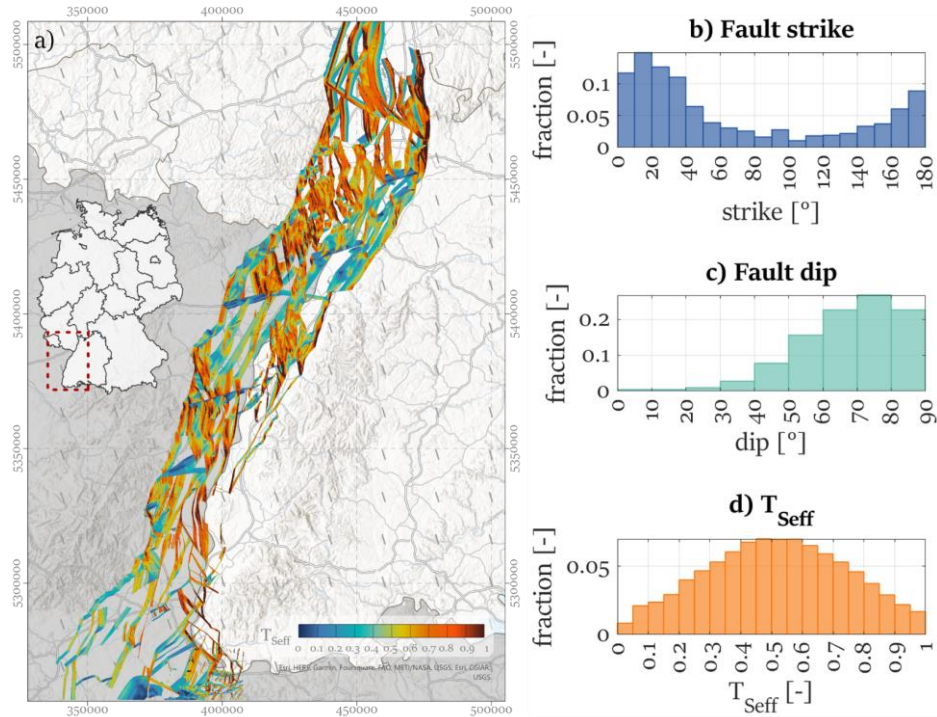

# Results: Molasse & North German Basin

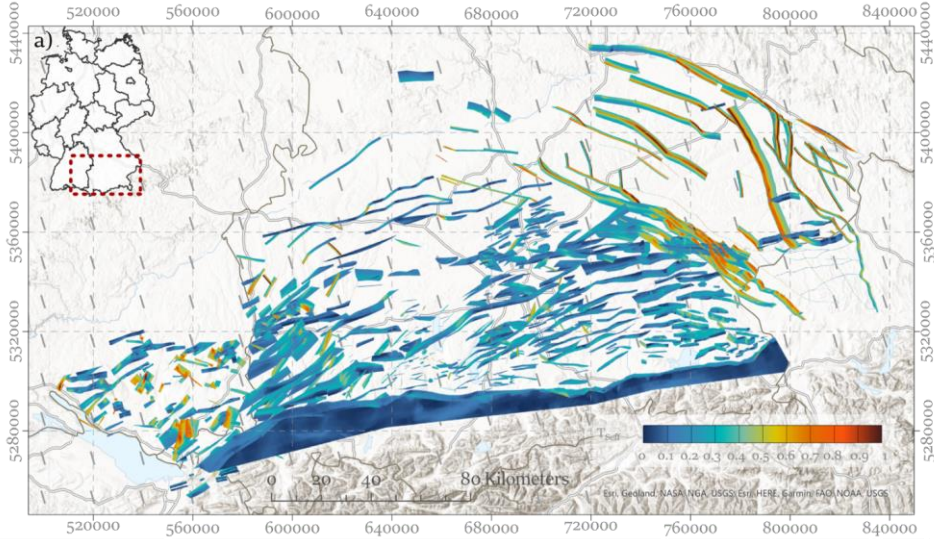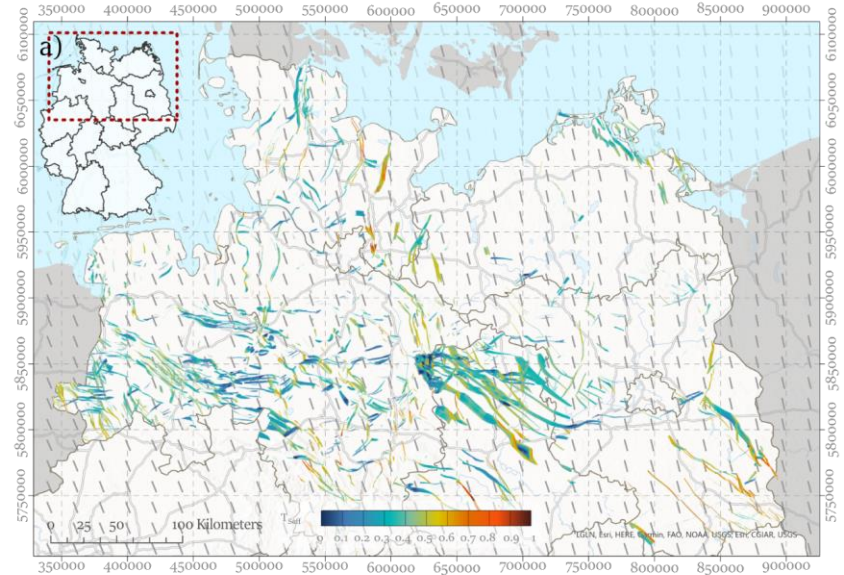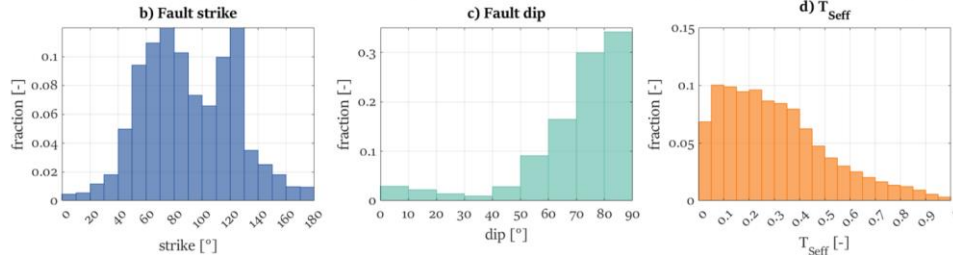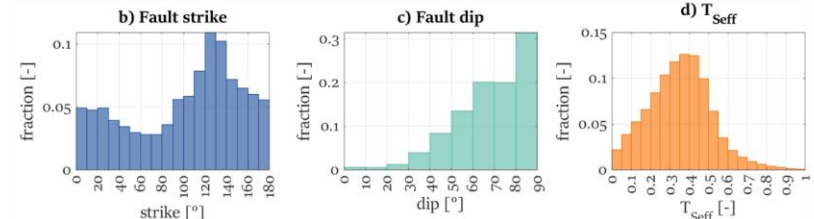



# Results: Pore Pressure

- Slip tendency increases with increasing pore pressure.
- Example: Molasse Basin

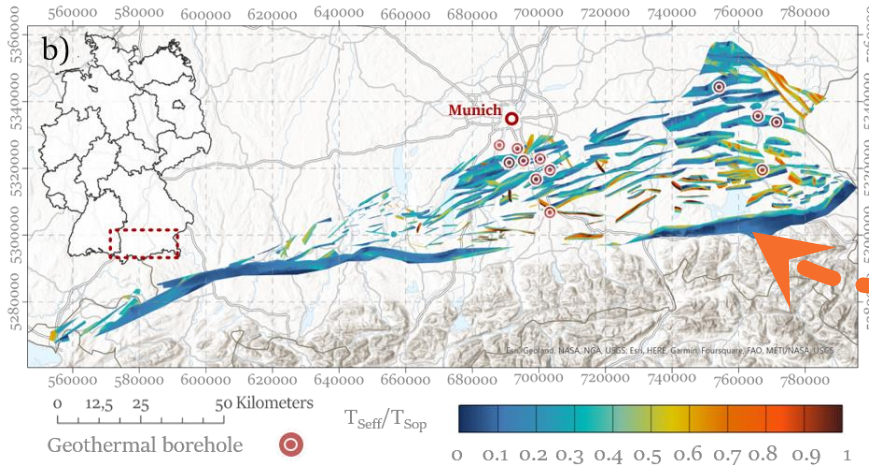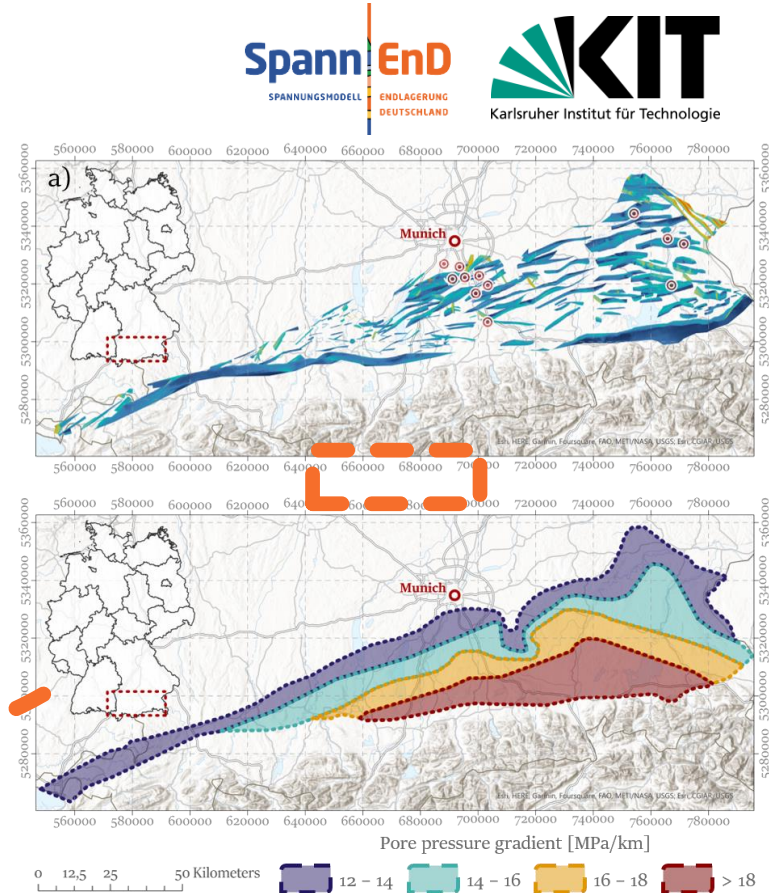

Map after Drews et al. (2018)

# Results: Pore Pressure

- Slip tendency increases with increasing pore pressure.
- Example: Molasse Basin

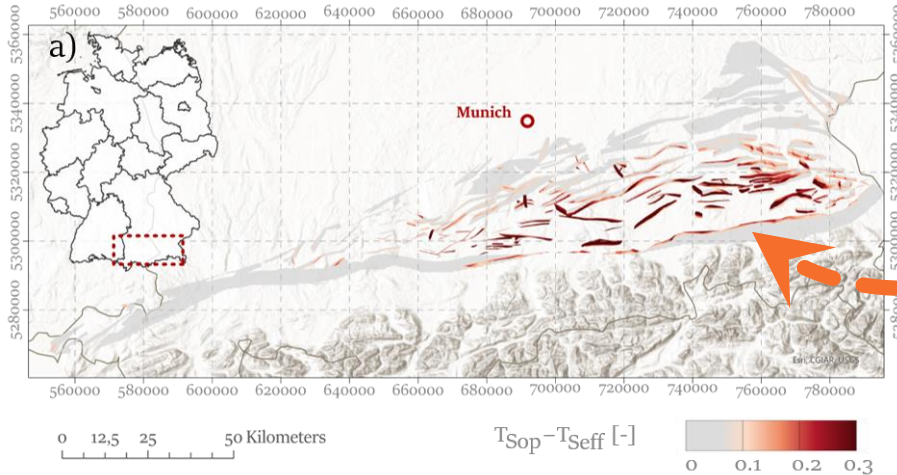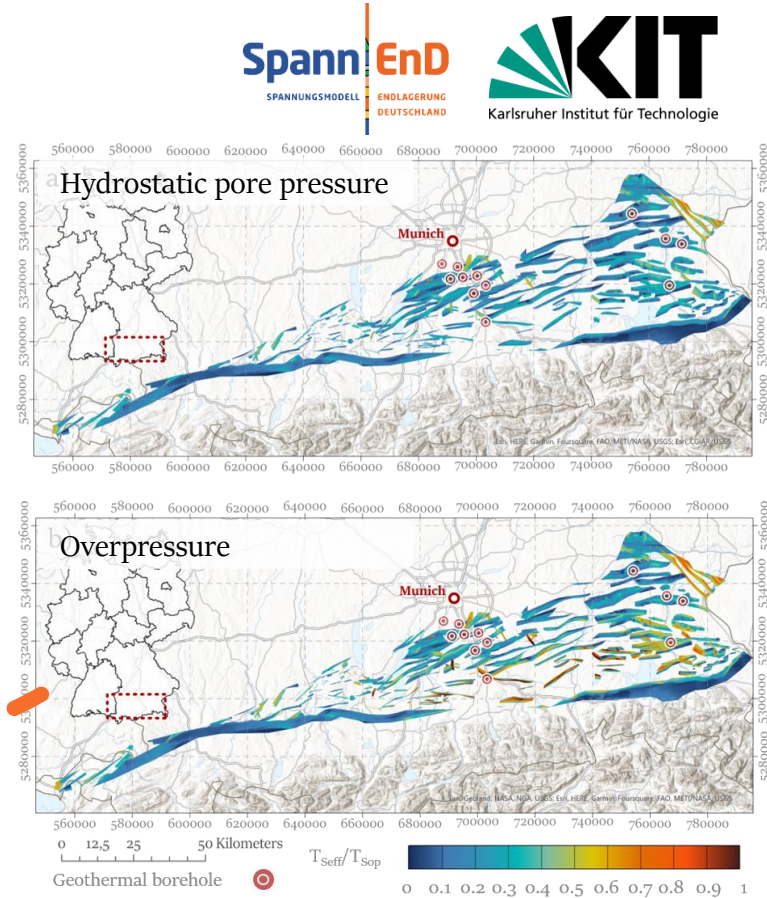

# Conclusion

- Slip tendency was calculated for 12.000 faults and segments.
- Slip tendency varies considerably between different regions.
- More data are crucial for further improvements of the prediction of the fault reactivation potential!

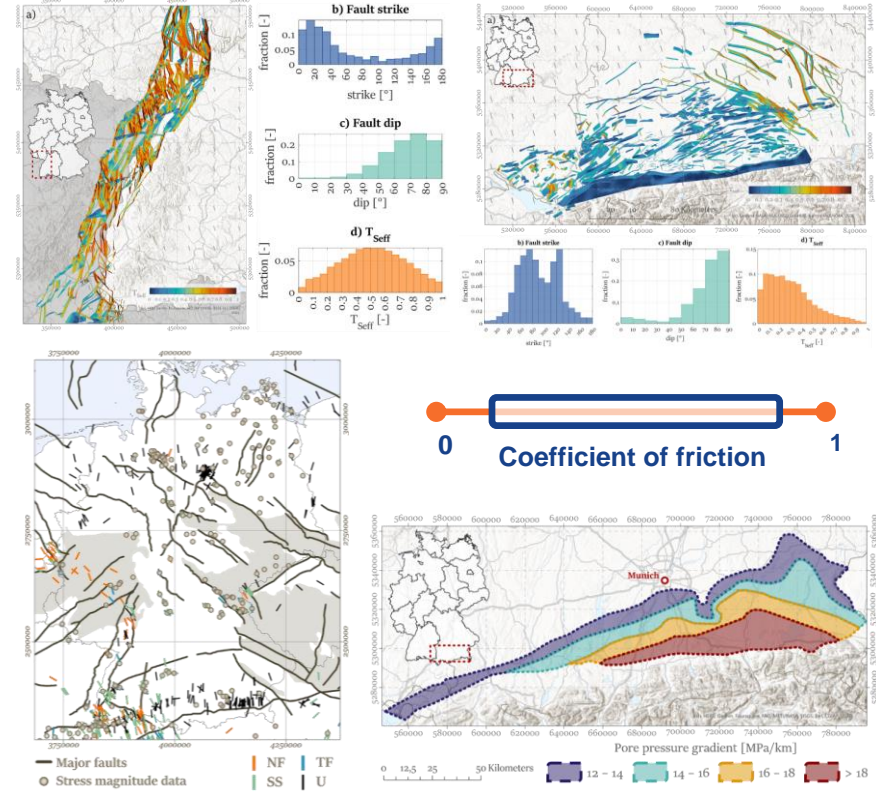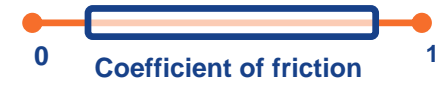

# Thank you for your attention!
